# Supplementary material
Source: publisher figshare collection journal article supplement (https://acs.figshare.com/ndownloader/files/12880871)
Supplement: Supplementary file 1 [file 12880871]

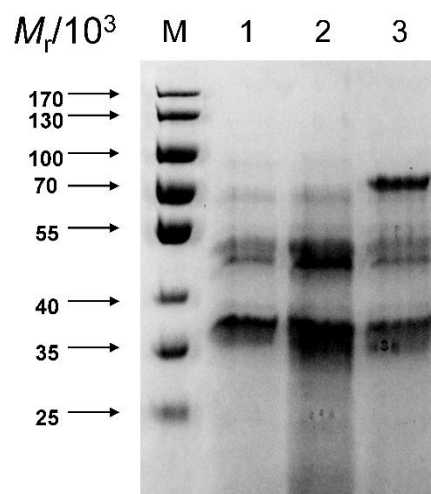

Figure S1. SDS-PAGE electrophoregram of enzyme samples from the cre\*M2 version construct and the controls. Supernatant of flask cultures were produced using 250 mL bottles containing 30 ml of fermentation medium using 30 g/L glucose as carbon source and shaken at 37 °C in a rotary shaker at 250 rpm. The 3% seed cultures were inoculated into the fermentation medium for batch fermentation. 1% xylose was added after 10 h of growth to initiate the expression. (M) Marker (1) *B. licheniformis* ADP1 (2) BIIIMA (3) BIIIMA- cre\*M2.
